# Supplementary material for: Liquid Lipids Act as Polymorphic Modifiers of Tristearin-Based Formulations Produced by Melting Technologies
Source: MDPI journal article supplement (doi:10.3390/pharmaceutics13071089), 2021-07-16
Supplement: s1 [file s1]

# Supplementary Material: Liquid Lipids Act as Polymorphic Modifiers of Tristearin-Based Formulations Produced by Melting Technologies

Serena Bertoni, Nadia Passerini and Beatrice Albertini

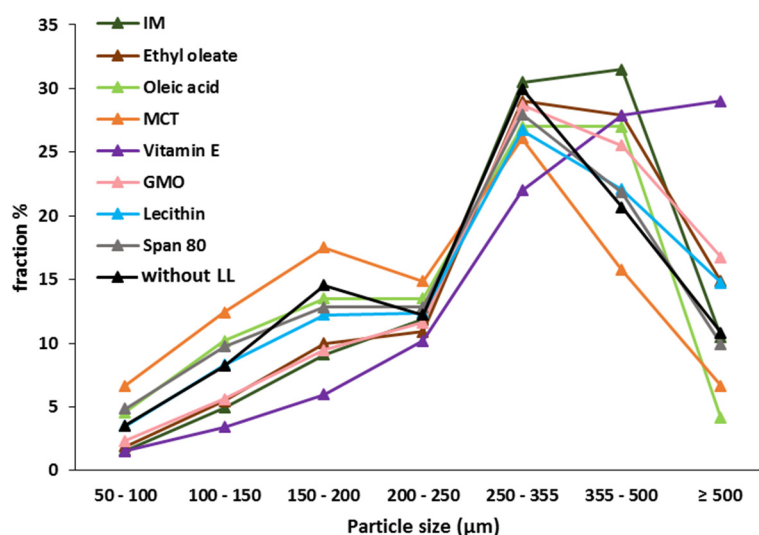

**Figure S1.** Particle size distribution of spray congealed MPs of pure tristearin and with LL addition.

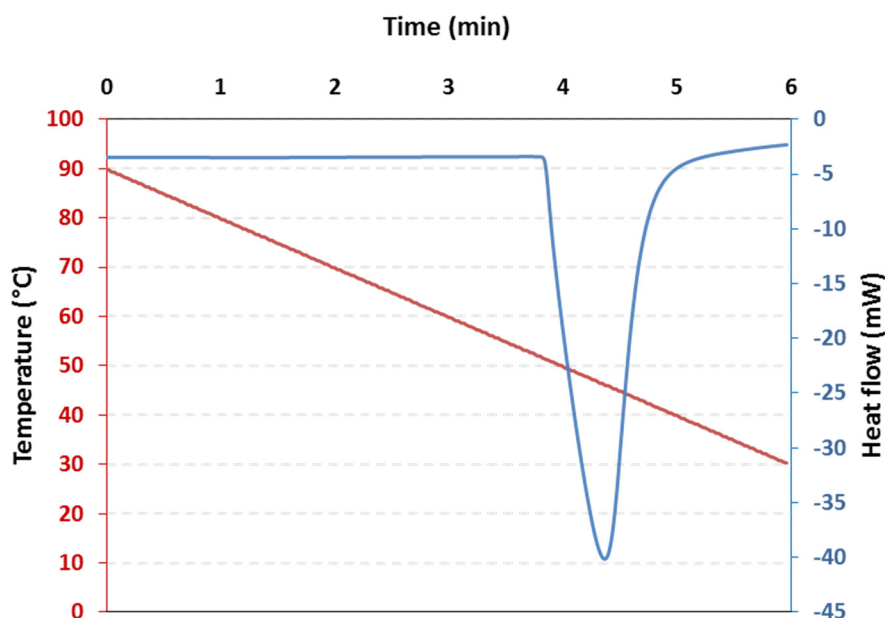

**Figure S2.** DSC curve of tristearin crystallization at nonisothermal conditions from 90°C to 30°C using a cooling rate of 10°C/min. Both the instrument temperature (red axes) and the measured heat flow (blue axes) are reported.

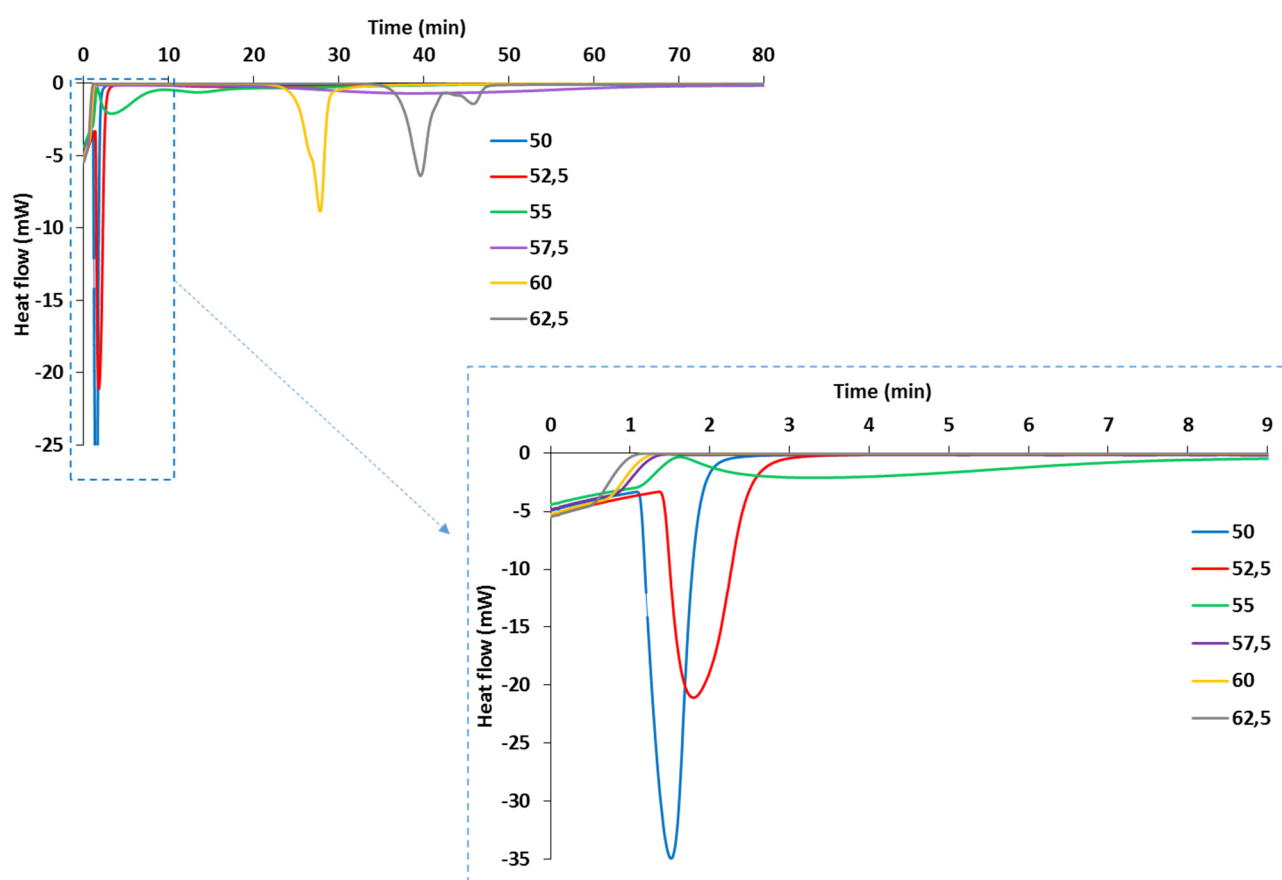

Figure S3. DSC curves of tristearin in the isothermal step at different crystallization temperatures ( $T_c$ ).

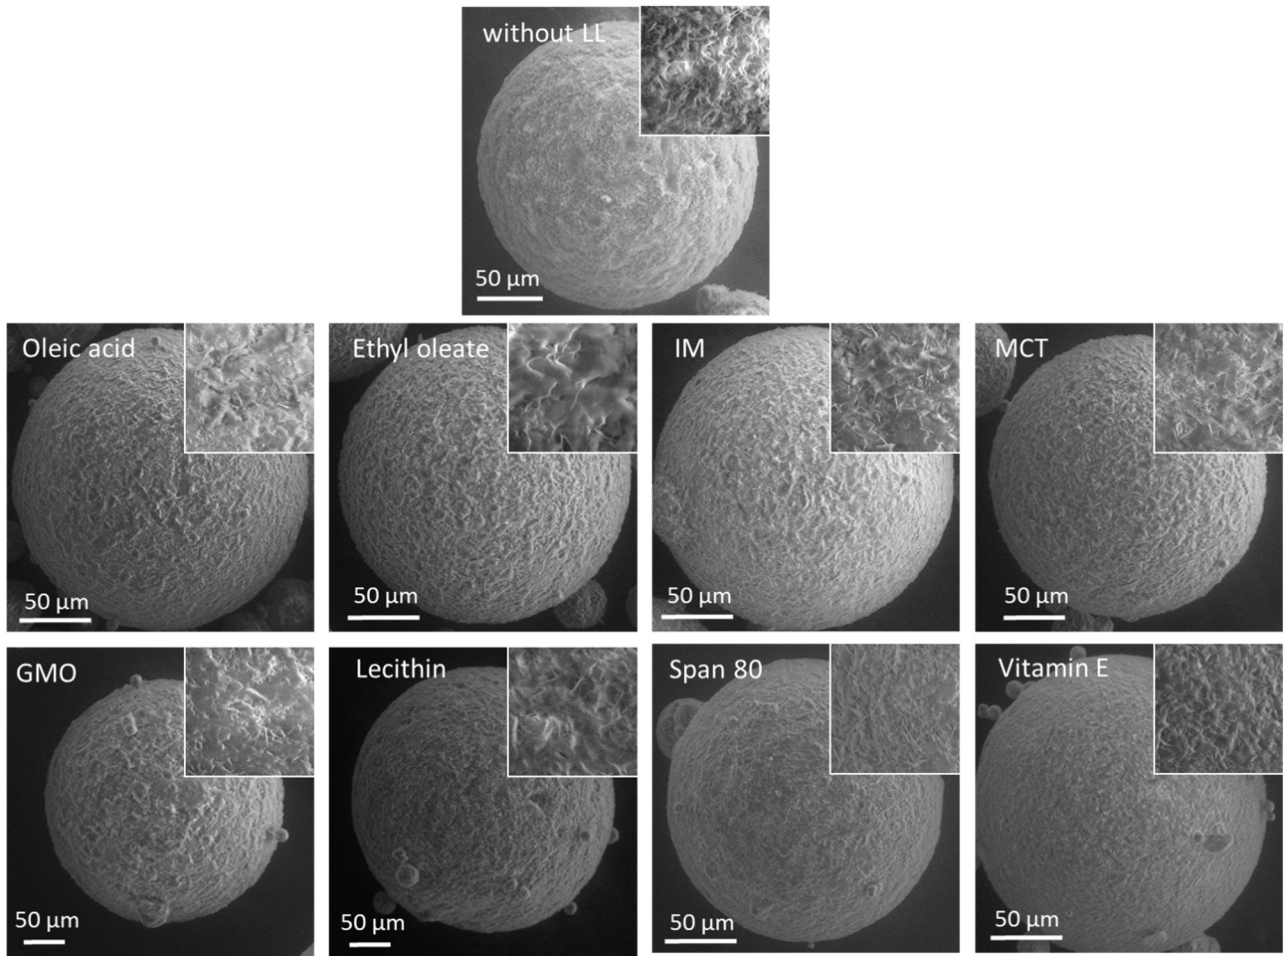

**Figure S4.** SEM images of particle morphology and magnified surface morphology of MPs without and with LL after 1 year from production.

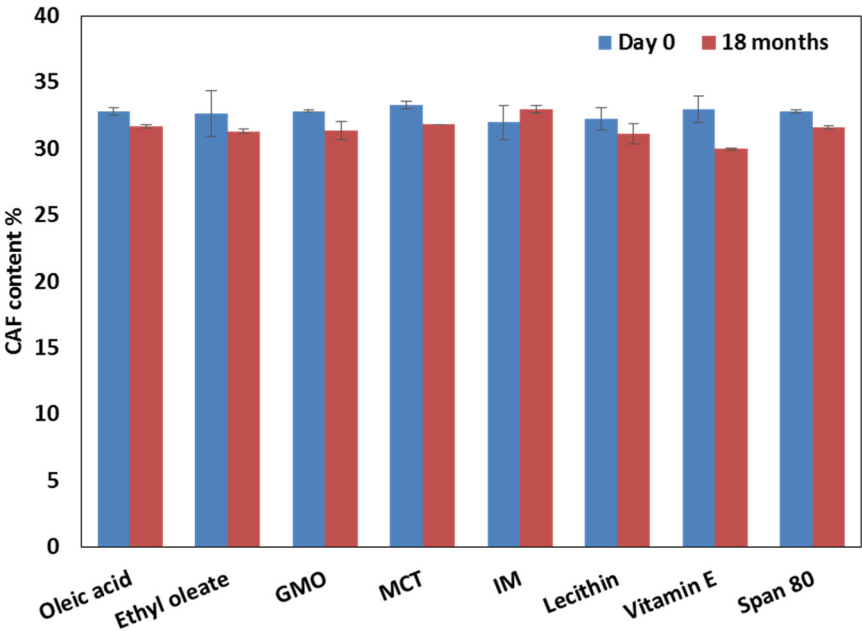

**Figure S5.** CAF content immediately after production (day 0) and after long-term storage (1 year).
